# Supplementary material for: Electrocatalytic activity compensation mechanism upon long-term operation of solid oxide fuel cells; LSCM cathode/SDC interlayer/YSZ electrolyte system
Source: Royal Society of Chemistry journal article supplement (doi:10.1039/d0ta04417b), 2020-01-01
Supplement: d0ta04417b1.pdf [file d0ta04417b1.pdf]

## Electronic Supplementary Information

### **Electrocatalytic activity compensation mechanism upon long-term operation of solid oxide fuel cells; LSCM cathode/SDC interlayer/YSZ electrolyte system**

Toshiaki Matsui <sup>a), \*</sup>, Norifumi Yoshida <sup>a)</sup>, Hiroki Muroyama <sup>a)</sup>, and Koichi Eguchi <sup>a)</sup>

a) Department of Energy and Hydrocarbon Chemistry, Graduate School of Engineering,  
Kyoto University, Nishikyo-ku, Kyoto 615-8510, Japan

\* Correspondence should be addressed to

Toshiaki Matsui

Department of Energy and Hydrocarbon Chemistry,

Graduate School of Engineering, Kyoto University,

Nishikyo-ku, Kyoto 615-8510, JAPAN

TEL: +81-75-383-7060, FAX: +81-75-383-2520

E-mail: matsui@elech.kuic.kyoto-u.ac.jp

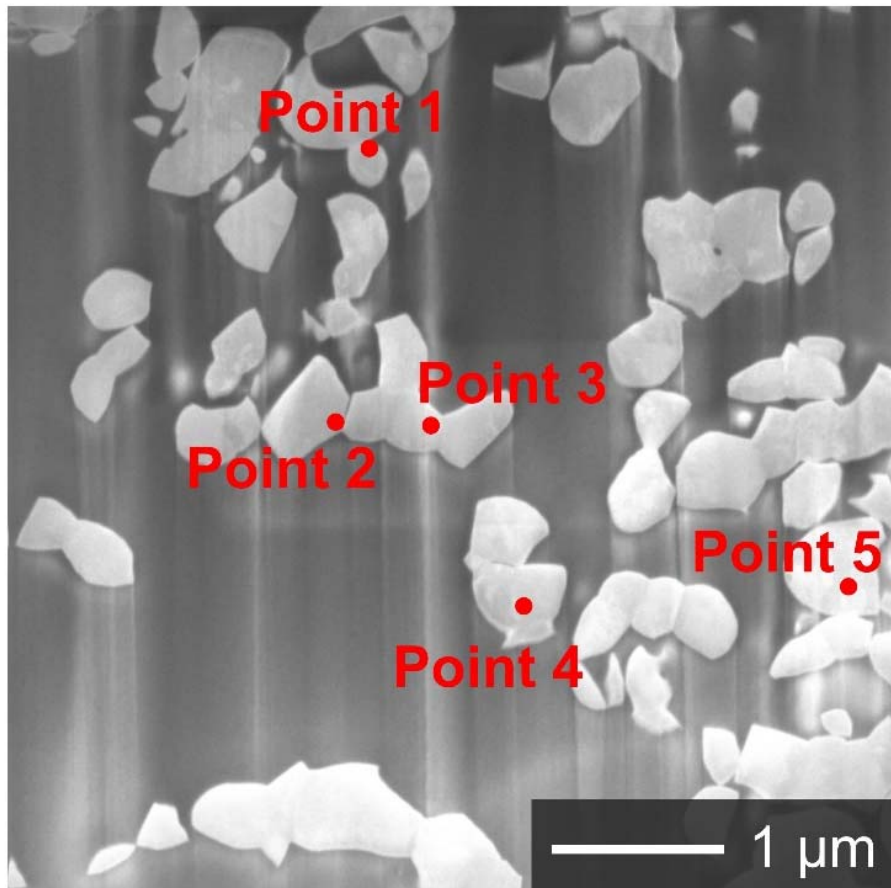

Fig. S1 Cross-sectional SE image of SCM60-SDC composite after the HCl treatment.

Fig. S1 T. Matsui et al.

Table S1 EDS point analysis of SCM60–SDC composite after the HCl treatment in Fig. S1.

|         | Element |    |    |      |      | Main phase |
|---------|---------|----|----|------|------|------------|
|         | Sm      | Ca | Mn | Ce   | O    |            |
| Point 1 | 1.6     | –  | –  | 30.0 | 68.4 |            |
| Point 2 | 1.9     | –  | –  | 28.1 | 70.0 | SDC        |
| Point 3 | 1.9     | –  | –  | 28.1 | 70.0 |            |
| Point 4 | 2.5     | –  | –  | 28.9 | 68.5 |            |
